# Supplementary material for: SASP-Dependent Interactions between Senescent Cells and Platelets Modulate Migration and Invasion of Cancer Cells
Source: MDPI journal article supplement (doi:10.3390/ijms20215292), 2019-10-24
Supplement: s1 [file s1]

Supplementary Materials:

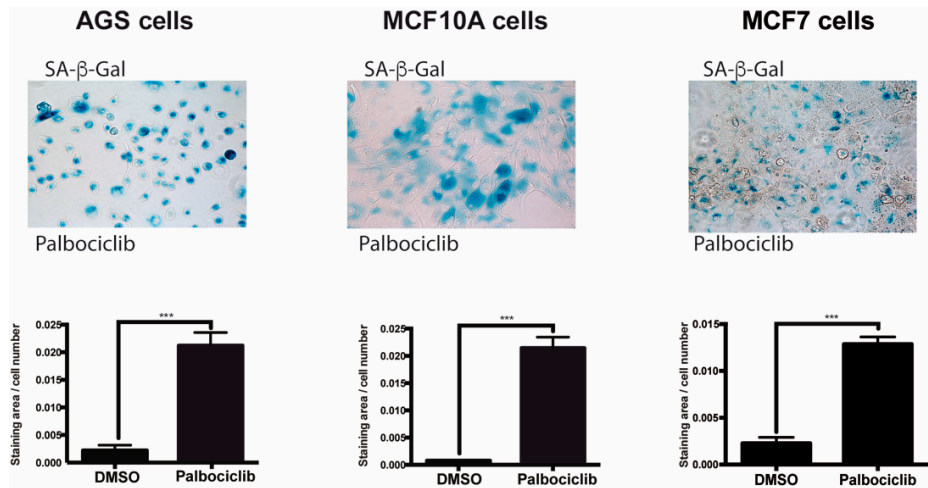

**Figure S1.** Pharmacological induction of senescence using Palbociclib. Cells were treated for 96 hours with 1  $\mu$ M Palbociclib and senescence induction was determined by senescent-associated  $\beta$ -galactosidase (SA- $\beta$ -Gal) assays. The relative proportion of SA- $\beta$ -Gal positive cells in at least 5 separate microscopic fields was determined by analyzing the colored area in Palbociclib- and DMSO-treated cells using ImageJ program. ( $n = 6$ ; \*\*\*  $p < 0.001$ ; error bars, mean  $\pm$  SD).

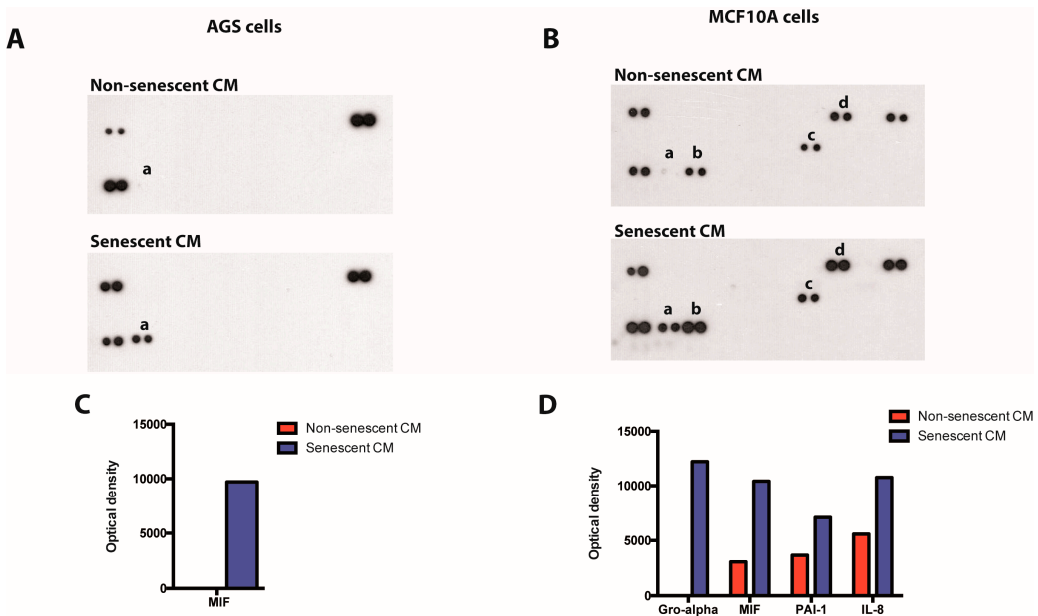

**Figure S2.** Human cytokine array analyses of media conditioned by senescent and non-senescent cells. After 96 hours of senescence induction, media conditioned by senescent (Palbociclib-treated) and non-senescent (DMSO-treated) cells were subjected to a human cytokine array panel capable of detecting 36 cytokines (panels A and B). Quantitative densitometric analyses, examining the ratio

between the intensities of signals of the indicated cytokines in conditioned media from Palbociclib- and DMSO-treated cells, were quantified in **C** and **D**. Cytokines that were upregulated in media conditioned by senescent MCF-10A cells compared with media conditioned by DMSO-treated control cells included MIF (Macrophage Migration Inhibitory Factor), PAI-1 (Plasminogen Activator Inhibitor 1), IL-8 and Gro- $\alpha$  (Growth Regulator Protein  $\alpha$ ). In contrast, only MIF was detected in conditioned media derived from senescent AGS cells (panels C and D). (a) MIF; (b) Gro- $\alpha$ ; (c) Serpin-E1; (d) IL-8.

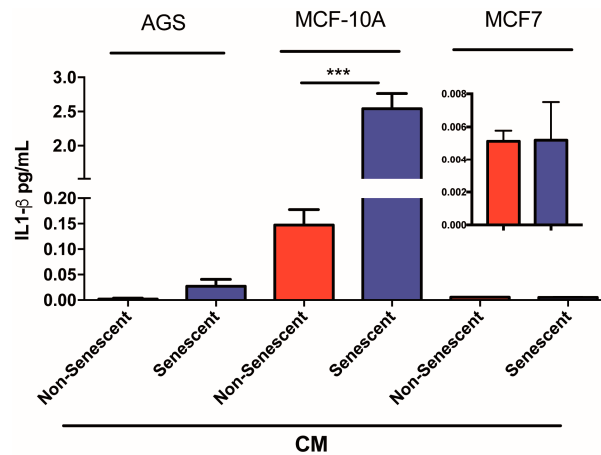

**Figure S3.** ELISA quantification of IL-1 $\beta$  (in pg/ml) present in media conditioned by senescent and non-senescent AGS, MCF-10A and MCF-7 cells ( $n = 3$ ; \*\*\*  $p < 0.001$ ; error bars, mean  $\pm$  SD).

**Table S1.** Primer sets used for quantitative real time PCR analyses.

| Gene                            | GenBank Accession | Forward 5'-3'                   | Reverse 5'-3'                  |
|---------------------------------|-------------------|---------------------------------|--------------------------------|
| <i>IL-1 <math>\alpha</math></i> | NM_000575.4       | AGA TGC CTG AGA TAC CCA AAA CC  | CCA AGC ACA CCC AGT AGT CT     |
| <i>IL-1<math>\beta</math></i>   | NM_000576.2       | ATG ATG GCT TAT TAC AGT GGC AA  | GTC GGA GAT TCG TAG CTG GA     |
| <i>IL-11</i>                    | NM_000641.3       | TTG TCC GAG ATG TCA TGG GTT     | TCC TGT CGC TGA TAT TCT CTC C  |
| <i>PAI-1 (serpine1)</i>         | NM_000602.4       | TAG ACC GAT TAT TGA CCG ACCT    | GTT TGC CAC GAG AAT CAA ATC C  |
| <i>MMP7</i>                     | NM_002423.4       | ATG TGG AGT GCC AGA TGT TGC     | AGC AGT TCC CCA TAC AAC TTT C  |
| <i>MMP14</i>                    | NM_004995.3       | CAT CTG TGA CGG GAA CTT TGA     | GGC AGT GTT GAT GGA CGC A      |
| <i>MMP3</i>                     | NM_002422.4       | ATG TTC GTT TTC TCC TGC CTG TGC | CGA GTG CTT CCC CTT CTC TTG G  |
| <i>MMP1</i>                     | NM_001145938.1    | TCT GGG GAA AAC CTT TCG ACT     | CAC CAA CGT ATT CAA AAG CAC AA |
| <i>MMP9</i>                     | NM_004994.2       | GAC AAG AAG TGG GGC TTC TG      | GCC ATT CAC GTC GTC CTT AT     |
| <i>MMP10</i>                    | NM_002425.2       | TGC TCT GCC TAT CCT CTG AGT     | TCA CAT CCT TTT CGA GGT TGT AG |
| <i>GM-CSF</i>                   | NM_000758.3       | TTC TGC TTG TCA TCC CCT TT      | TGC CTG TAT CAG GGT CAG TG     |
| <i>G-CSF</i>                    | NM_000759.3       | CAA GCC CTC CCC ATC CCA TGT AT  | GGG ATG GGA GGA CAG GAG CTT TT |
| <i>FN1 (Fibronectin)</i>        | NM_001278438.1    | GAG TTG TCG TGG TCC CTC AG      | TGG AGG CGG CAT CAT AGT TG     |
| <i>ICAM-1</i>                   | NM_000201.2       | TCC CTT CCC CCC AAA ACT GAC A   | GCT CCC AGT GAA ATG CAA ACA GG |
| <i>THPO</i>                     | NM_000460.4       | GGT TCA CCC TTT GCC TAC ACC     | CCT CCA TCT GGG TTT TCC ATT C  |
| <i>PAI-2</i>                    | NM_001143818.1    | AAA TGG GCT TTA TCC TTT CCG T   | AGC TTT TCA CGC AAG TAC ATC A  |
| <i>RL19</i>                     | NM_000981         | CAT CCG CAA GCC TGT GAC         | TGT GAC CTT CTC TGG CAT TCG    |
